# Supplementary material for: Flower Development in Cassava Is Feminized by Cytokinin, While Proliferation Is Stimulated by Anti-Ethylene and Pruning: Transcriptome Responses
Source: Front Plant Sci. 2021 May 28;12:666266. doi: 10.3389/fpls.2021.666266 (PMC8194492; doi:10.3389/fpls.2021.666266)
Supplement: Supplementary Table 2 — Mean values and standard deviation for genotypes IITA-TMS-IBA980002, IITA-TMS-IBA30572, and TMEB419 in Experiment II (2018–2019). Shown are the effects of PGRs and pruning on: total flower numbers, female flower numbers, fruit numbers, and proportion of female flowers (reflecting only plants with at least one flower). [file Table_2.XLSX]

## Sheet: 2018-2019 Exp II
				total number of female+male flowers			number of female flowers			proportion of flowers female			number of fruit
	genotype	treatment	Prune	mean_total	se_total	n	mean_femno1	se_total	n	mean_prop.fem	se_prop.fem	n	mean_fruitno1	se_fruitno1	n
1	IITA-TMS-IBA980002	Control	unpruned	13.2879	5.6266	66	2.77273	1.03725	66	0.358507	0.0937861	26	0.621212	0.250654	66
2	IITA-TMS-IBA980002	Control	pruned	18.5333	4.72342	45	3.24444	1.33982	45	0.201024	0.0658941	24	0.311111	0.158344	45
3	IITA-TMS-IBA980002	BA	unpruned	4.20896	1.30329	67	3.65672	1.10518	67	0.838612	0.0787787	17	0.0746269	0.0613191	67
4	IITA-TMS-IBA980002	BA	pruned	13.3061	3.15221	49	10.6939	2.93353	49	0.808543	0.0718429	22	0.22449	0.127992	49
5	IITA-TMS-IBA980002	BA+BA	unpruned	5.11594	1.8244	69	4.49275	1.76419	69	0.828151	0.103492	13	0.115942	0.07596	69
6	IITA-TMS-IBA980002	BA+BA	pruned	7.06383	2.44787	47	7.04255	2.4491	47	0.933333	0.0666667	15	0.0638298	0.0471604	47
7	IITA-TMS-IBA980002	STS+BA	unpruned	28.7885	5.01869	52	18.2692	3.41511	52	0.721555	0.0522135	40	5.11538	1.29031	52
8	IITA-TMS-IBA980002	STS+BA	pruned	24.5	4.87712	38	19.4474	4.28596	38	0.807302	0.0626177	27	5.13158	1.57739	38
9	IITA-TMS-IBA980002	STS+BA+BA	unpruned	20.661	3.35609	59	16.4407	2.90712	59	0.807175	0.0489111	39	3.64407	0.712567	59
10	IITA-TMS-IBA980002	STS+BA+BA	pruned	18	4.46083	29	15.1379	3.95284	29	0.845861	0.0736518	18	3.06897	1.13164	29
11	IITA-TMS-IBA30572	Control	unpruned	2.42857	0.890712	49	0.571429	0.34871	49	0.28462	0.140863	9	0.306122	0.162893	49
12	IITA-TMS-IBA30572	Control	pruned	20.3778	4.18418	45	11.8222	2.93108	45	0.56056	0.0747693	31	1.95556	0.665116	45
13	IITA-TMS-IBA30572	BA	unpruned	1.38983	0.78114	59	1.25424	0.766249	59	0.8	0.126491	5	0.135593	0.0703071	59
14	IITA-TMS-IBA30572	BA	pruned	27.0857	5.64248	35	27.0286	5.62759	35	0.998718	0.00128205	20	4.31429	1.87364	35
15	IITA-TMS-IBA30572	BA+BA	unpruned	0.1875	0.117588	64	0.1875	0.117588	64	1	0	4	0.078125	0.0641825	64
16	IITA-TMS-IBA30572	BA+BA	pruned	17.6667	4.47101	33	17.6667	4.47101	33	1	0	21	1.72727	0.706132	33
17	IITA-TMS-IBA30572	STS+BA	unpruned	18.36	4.11337	50	16.88	3.9423	50	0.864875	0.0639478	21	9.78	2.72947	50
18	IITA-TMS-IBA30572	STS+BA	pruned	41.75	6.46973	40	41.125	6.37052	40	0.975872	0.0142813	34	20.25	4.87994	40
19	IITA-TMS-IBA30572	STS+BA+BA	unpruned	16.4375	4.09288	48	16.2708	4.10357	48	0.958333	0.0416667	24	6.16667	1.99874	48
20	IITA-TMS-IBA30572	STS+BA+BA	pruned	36.4571	6.98767	35	35.9143	6.98935	35	0.980426	0.0149963	24	15.7429	4.0653	35
21	TMEB419	Control	unpruned	0.305556	0.278372	36	0.0277778	0.0277778	36	0.5	0.5	2	0	0	36
22	TMEB419	Control	pruned	8.72222	4.32564	18	2.11111	1.25477	18	0.439394	0.189156	7	0.111111	0.111111	18
23	TMEB419	BA	unpruned	0.16129	0.114505	31	0.129032	0.100984	31	0.75	0.25	2	0	0	31
24	TMEB419	BA	pruned	6.8	2.45657	20	6.3	2.44745	20	0.890893	0.0690037	10	0.05	0.05	20
25	TMEB419	BA+BA	unpruned	0.310345	0.248659	29	0.310345	0.248659	29	1	0	2	0.0344828	0.0344828	29
26	TMEB419	BA+BA	pruned	8.21429	4.71632	14	8.21429	4.71632	14	1	0	3	0.642857	0.341412	14
27	TMEB419	STS+BA	unpruned	13.275	3.18972	40	12.45	2.96604	40	0.919884	0.040437	24	2.05	0.612843	40
28	TMEB419	STS+BA	pruned	23.5	5.27747	22	14.2727	3.81906	22	0.754871	0.0901262	17	5.59091	2.19963	22
29	TMEB419	STS+BA+BA	unpruned	12.8974	3.13437	39	12.8718	3.13661	39	0.985507	0.0144928	23	2.66667	0.816772	39
30	TMEB419	STS+BA+BA	pruned	27.2857	4.89381	28	21.9286	4.18802	28	0.854033	0.0637004	22	4.35714	1.93971	28
